# Supplementary material for: Preparation of Multicolour Solid Fluorescent Carbon Dots for Light-Emitting Diodes Using Phenylethylamine as a Co-Carbonization Agent
Source: MDPI journal article supplement (doi:10.3390/ijms231911071), 2022-09-21
Supplement: s1 [file s1]

## Supporting Information

### **Preparation of Multicolour Solid Fluorescent Carbon Dots for Light-Emitting Diodes Using Phenylethylamine As a Co-Carbonization Agent**

Yulong An <sup>1</sup>, Can Liu <sup>1,2,\*</sup>, Yan Li <sup>1</sup>, Menglin Chen <sup>1</sup>, Yunwu Zheng <sup>1</sup>, Hao Tian <sup>3</sup>, Rui Shi <sup>2</sup>,  
Xiahong He <sup>2</sup> and Xu Lin <sup>1,2,\*</sup>

<sup>1</sup> National Joint Engineering Research Center for Highly-Efficient Utilization Technology of Forestry Resources, Southwest Forestry University, Kunming 650224, China

<sup>2</sup> Key Laboratory for Forest Resources Conservation and Utilization in the Southwest Mountains of China, Ministry of Education, Southwest Forestry University, Kunming 650224, China

<sup>3</sup> Agro-products Processing Research Institute, Yunnan Academy of Agricultural Sciences, Kunming 650000, China

\* Correspondence: liucan@swfu.edu.cn (C.L.); linxu@swfu.edu.cn (X.L.)

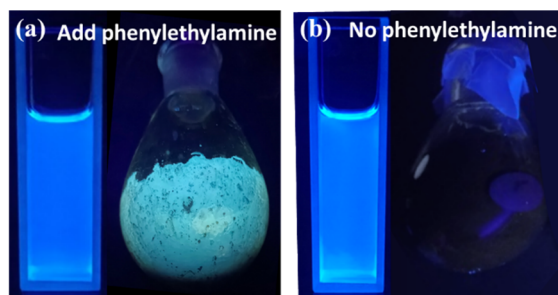

**Figure S1.** CDs prepared in reaction systems with phenylethylamine (a) and without phenylethylamine (b).

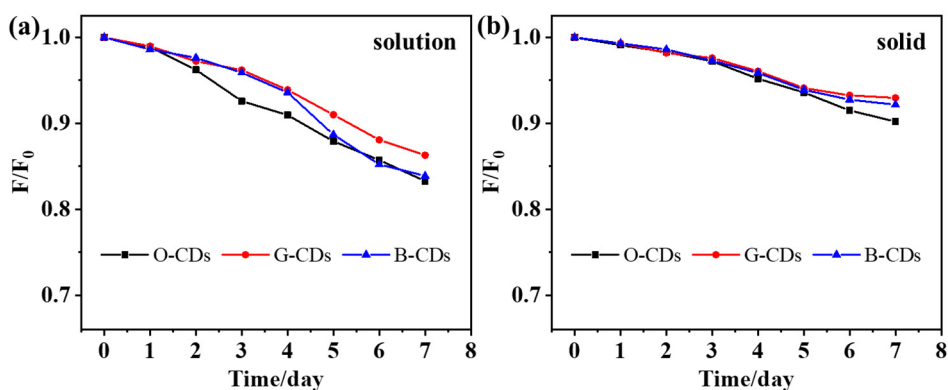

**Figure S2.** Decay curve of PL intensity of CDs in solution (a) and solid state (b) with increasing visible light time.

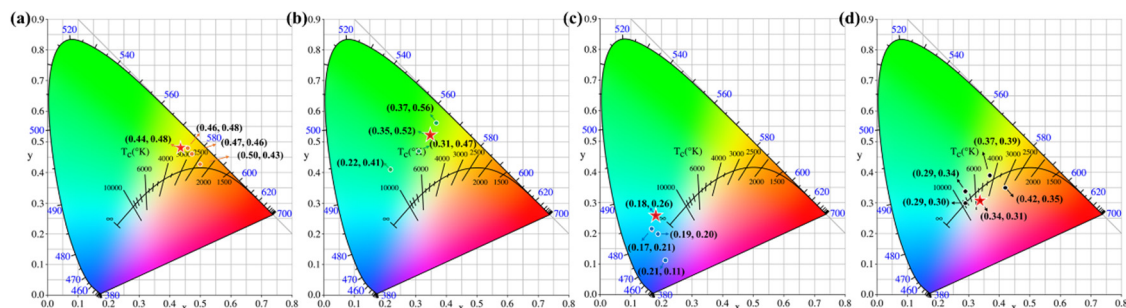

**Figure S3.** CIE 1931 diagram comparing the color coordinates of (a) orange, (b) green, (c) blue and (d) white LEDs reported in the literature with the LEDs in this study. Note: The red star represents the color-coordinate position of the LED prepared in this study.

**Table S1.** Comparison of process parameters and performance of O-CDs, G-CDs and B-CDs.

| Synthetic Method |                     |                   | PL Color |        | Stability |       | QY       |       |
|------------------|---------------------|-------------------|----------|--------|-----------|-------|----------|-------|
| Sample           | Reaction Precursor  | Reaction Solution | Solution | Solid  | Solution  | Solid | Solution | Solid |
| O-CDs            | Citric acid         | methanol          | green    | orange | 83%       | 90%   | 36.7%    | 13.9% |
| G-CDs            | + urea + phenylethy | ethanol           | green    | green  | 86%       | 93%   | 69.6%    | 35.7% |
| B-CDs            | lamine              | water             | blue     | blue   | 84%       | 92%   | 67.3%    | 2.6%  |

**Table S2.** The preparation method and fluorescence QY of solid fluorescent CDs have been reported.

| Preparation Method                            | CDs PL Color | QY (%) | References |
|-----------------------------------------------|--------------|--------|------------|
| Assemble BaSO <sub>4</sub> on the CDs surface | green        | 27.0   | [25]       |
| Scattered in PVP matrix                       | red          | 41.3   | [31]       |
| One step hydrothermal method                  | white        | 2.0    | [30]       |
| One step hydrothermal method                  | green        | 26.0   | [22]       |
| One step hydrothermal method                  | white        | 35.0   | [23]       |

**Table S3.** CIE coordinates of LEDs with different luminescence colors reported in the literature.

| LED Color | CIE (X, Y) | References |
|-----------|------------|------------|
| Blue      | 0.17, 0.21 | [14]       |
|           | 0.21, 0.11 | [16]       |
|           | 0.19, 0.20 | [54]       |
| Green     | 0.22, 0.41 | [15]       |
|           | 0.31, 0.47 | [54]       |
|           | 0.37, 0.56 | [55]       |
| Orange    | 0.47, 0.46 | [7]        |
|           | 0.50, 0.43 | [15]       |
|           | 0.46, 0.48 | [54]       |
| White     | 0.37, 0.39 | [14]       |
|           | 0.29, 0.30 | [16]       |
|           | 0.29, 0.34 | [23]       |
|           | 0.34, 0.31 | [24]       |
|           | 0.42, 0.35 | [47]       |
